# Supplementary material for: Improvement of nuclear facilities DNP3 protocol data transmission security using super encryption BRC4 in SCADA systems
Source: PeerJ journal article supplement (doi:10.7717/peerj-cs.727), 2021-11-04
Supplement: Appendix_1_The_Time_Complexity_Analysis_for_Encryption_Code.pdf [file Appendix_1_The_Time_Complexity_Analysis_for_Encryption_Code.pdf]

Appendix 1 The Time Complexity Analysis for Encryption Code

| Code                                    | C <sub>i</sub> | ∑C <sub>i</sub> | Total    |
|-----------------------------------------|----------------|-----------------|----------|
| tic;                                    | C1             | 1               | C1       |
| jum=length(data);                       | C3             | 1               | C3       |
| D=data(1);                              | C3             | 1               | C3       |
| for i=2:jum                             | C4             | (n-1)           | (n-1) C4 |
| D=[D ' ' data(i)];                      | C1             | (n-1)           | (n-1) C1 |
| end;                                    |                |                 |          |
| D=[D ''];                               | C1             | 1               | C1       |
| H=[];                                   | C1             | 1               | C1       |
| n=length(D);                            | C3             | 1               | C3       |
| for i=1:n                               | C4             | n               | nC4      |
| H=[H char(D(i))];                       | C2             | n               | nC2      |
| end;                                    |                |                 |          |
| hasil=double(H);                        | C3             | 1               | C3       |
| kunci=randi(256,1,pk);                  | C3             | 3               | 3C3      |
| n=length(hasil);                        | C3             | 1               | C3       |
| m=length(kunci);                        | C3             | 1               | C3       |
| if n>m                                  | C5             | 1               | C5       |
| t=m+1;                                  | C2             | 1               | C2       |
| KB=kunci;                               | C1             | 1               | C1       |
| while t<=n                              | C4             | n               | nC4      |
| KB(t)=mod((KB(t-m)+KB(t-1)),256);       | C2             | 6n              | 6nC2     |
| t=t+1;                                  | C2             | 1               | C2       |
| end;                                    |                |                 |          |
| else                                    |                |                 |          |
| KB=kunci(1:n);                          |                |                 |          |
| end;                                    |                |                 |          |
| CB=[];                                  | C1             | 1               | C1       |
| for j=1:n                               | C4             | n               | nC4      |
| hasil2=hasil(j)-KB(j);                  | C2             | n               | nC2      |
| CB=[CB mod(hasil2,256)];                | C2             | 3               | 3C2      |
| end;                                    |                |                 |          |
| m=length(kunci);                        | C3             | 1               | C3       |
| if m<256                                | C5             | 1               | C5       |
| t=m+1;                                  | C2             | 1               | C2       |
| KRC4=kunci;                             | C1             | 1               | C1       |
| while t<=256                            | C4             | 256             | 256C4    |
| KRC4(t)=mod((KRC4(t-m)+KRC4(t-1)),256); | C2             | 6x256           | 1536C2   |
| t=t+1;                                  | C2             | 256             | 256C2    |
| end;                                    |                |                 |          |
| else                                    |                |                 |          |
| KRC4=kunci(1:256);                      |                |                 |          |

| Code                                    | Ci | $\sum Ci$   | Total    |
|-----------------------------------------|----|-------------|----------|
| end;                                    |    |             |          |
| for i=1:256                             | C4 | 256         | 256C4    |
| s(i)=i-1;                               | C2 | 256         | 256C2    |
| end;                                    |    |             |          |
| j=0;                                    | C1 | 1           | C1       |
| for i=1:256                             | C4 | 256         | 256C4    |
| j=mod((j+s(i)+ KRC4(i)),256);           | C2 | 5x256       | 1280C2   |
| dummy=s(i);                             | C1 | 1           | C2       |
| s(i)=s(j+1);                            | C2 | 1           | C2       |
| s(j+1)=dummy;                           | C2 | 1           | C2       |
| end;                                    |    |             |          |
| i=0;                                    | C1 | 1           | C1       |
| j=0;                                    | C1 | 1           | C1       |
| for idx=1:256                           | C4 | 256         | 256C4    |
| i =mod((i + 1),256) ;                   | C2 | 4x256       | 1024C2   |
| j =mod((j + KRC4(i + 1)),256);          | C2 | 5x256       | 1280C2   |
| dummy=KRC4(i+1);                        | C2 | 1           | C2       |
| KRC4(i+1)=KRC4(j+1);                    | C2 | 2           | 2C2      |
| KRC4(j+1)=dummy;                        | C2 | 1           | C2       |
| t=mod((KRC4(i + 1) + KRC4(j + 1)),256); | C2 | 6           | 6C2      |
| PRC4(idx)=KRC4(t + 1) ;                 | C2 | 1           | C2       |
| end;                                    |    |             |          |
| if n<256                                | C5 | 1           | C5       |
| PRC4=PRC4(1:n);                         |    |             |          |
| STL=mod((CB+PRC4),256);                 |    |             |          |
| Else                                    |    |             |          |
| blok=ceil(n/256);                       | C3 | 1           | C3       |
| STL=[];                                 | C1 | 1           | C1       |
| for i=1:blok                            | C4 | n/256       | nC4/256  |
| if n>256                                | C5 | n/256       | nC5/256  |
| dumi=CB(1:256);                         | C2 | n/256       | nC2/256  |
| hasil3=mod((dumi+PRC4),256);            | C2 | 4n/256      | 4nC2/256 |
| KRC4=PRC4;                              | C1 | n/256       | nC1/256  |
| for i=1:256                             | C4 | n/256 x 256 | nC4      |
| s(i)=i-1;                               | C2 | n           | nC2      |
| end;                                    |    |             |          |
| j=0;                                    | C1 | n/256       | nC1/256  |
| for i=1:256                             | C4 | n/256 x 256 | nC4      |
| j=mod((j+s(i)+ KRC4(i)),256);           | C2 | 5n          | 5nC2     |
| dummy=s(i);                             | C1 | n           | nC1      |
| s(i)=s(j+1);                            | C2 | n           | nC2      |
| s(j+1)=dummy;                           | C2 | n           | nC2      |
| end;                                    |    |             |          |

| Code                                    | Ci | $\sum Ci$   | Total   |
|-----------------------------------------|----|-------------|---------|
| i=0;                                    | C1 | n/256       | nC1/256 |
| j=0;                                    | C1 | n/256       | nC1/256 |
| for idx=1:256                           | C4 | n/256 x 256 | nC4     |
| i =mod((i + 1),256) ;                   | C2 | 4n          | 4nC2    |
| j =mod((j + KRC4(i + 1)),256);          | C2 | 5n          | 5nC2    |
| dummy=KRC4(i+1);                        | C2 | n           | nC2     |
| KRC4(i+1)=KRC4(j+1);                    | C2 | n           | nC2     |
| KRC4(j+1)=dummy;                        | C2 | n           | nC2     |
| t=mod((KRC4(i + 1) + KRC4(j + 1)),256); | C2 | 6n          | 6nC2    |
| PRC4(idx)=KRC4(t + 1) ;                 | C2 | n           | nC2     |
| end;                                    |    |             |         |
| CB=CB(257:end);                         | C2 | n/256       | nC2/256 |
| else                                    |    |             |         |
| PRC4=PRC4(1:n);                         |    |             |         |
| hasil3=mod((CB+PRC4),256);              |    |             |         |
| end;                                    |    |             |         |
| STL=[STL hasil3];                       | C2 | n/256       | nC2/256 |
| n=length(CB);                           | C3 | n/256       | nC3/256 |
| end;                                    |    |             |         |
| end;                                    |    |             |         |
| cipher=[STL kunci pk];                  | C2 | 2           | 2C2     |
| time=toc;                               | C1 | 1           | C1      |
| Te=time;                                | C1 | 1           | C1      |
|                                         |    |             |         |
