# Supplementary material for: Improvement of nuclear facilities DNP3 protocol data transmission security using super encryption BRC4 in SCADA systems
Source: PeerJ journal article supplement (doi:10.7717/peerj-cs.727), 2021-11-04
Supplement: Appendix_2_The_Time_Complexity_Analysis_for_Decryption_Code.pdf [file Appendix_2_The_Time_Complexity_Analysis_for_Decryption_Code.pdf]

Appendix 2 The Time Complexity Analysis for Decryption Code

| Code                                     | C <sub>i</sub> | ∑C <sub>i</sub> | Total  |
|------------------------------------------|----------------|-----------------|--------|
| tic;                                     | C1             | 1               | C1     |
| pk=cipher(end);                          | C3             | 1               | C3     |
| n=length(cipher);                        | C3             | 1               | C3     |
| kunci=cipher(n-pk:end-1);                | C2             | 2               | 2C2    |
| m=n-pk-1;                                | C2             | 2               | 2C2    |
| STL=cipher(1:m);                         | C2             | 1               | C2     |
| if pk<256                                | C5             | 1               | C5     |
| t=pk+1;                                  | C2             | 1               | C2     |
| KRC4=kunci;                              | C1             | 1               | C1     |
| while t<=256                             | C4             | 256             | 256C4  |
| KRC4(t)=mod((KRC4(t-pk)+KRC4(t-1)),256); | C2             | 6x256           | 1536C2 |
| t=t+1;                                   | C2             | 256             | 256C2  |
| end;                                     |                |                 |        |
| else                                     |                |                 |        |
| KRC4=kunci(1:256);                       |                |                 |        |
| end;                                     |                |                 |        |
| n=length(STL);                           | C3             | 1               | C3     |
| for i=1:256                              | C4             | 256             | 256C4  |
| s(i)=i-1;                                | C2             | 256             | 256C2  |
| end;                                     |                |                 |        |
| j=0;                                     | C1             | 1               | C1     |
| for i=1:256                              | C4             | 256             | 256C4  |
| j=mod((j+s(i)+ KRC4(i)),256);            | C2             | 5x256           | 1280C2 |
| dummy=s(i);                              | C1             | 256             | 256C1  |
| s(i)=s(j+1);                             | C2             | 256             | 256C2  |
| s(j+1)=dummy;                            | C2             | 256             | 256C2  |
| end;                                     |                |                 |        |
| i=0;                                     | C1             | 1               | C1     |
| j=0;                                     | C1             | 1               | C1     |
| for idx=1:256                            | C4             | 256             | 256C4  |
| i =mod((i + 1),256) ;                    | C2             | 4x256           | 1024C2 |
| j =mod((j + KRC4(i + 1)),256);           | C2             | 5x256           | 1280C2 |
| dummy=KRC4(i+1);                         | C2             | 256             | 256C2  |
| KRC4(i+1)=KRC4(j+1);                     | C2             | 2x256           | 1024C2 |
| KRC4(j+1)=dummy;                         | C2             | 256             | 256C2  |
| t=mod((KRC4(i + 1) + KRC4(j + 1)),256);  | C2             | 6x256           | 1536C2 |
| PRC4(idx)=KRC4(t + 1) ;                  | C2             | 256             | 256C2  |
| end;                                     |                |                 |        |

| Code                                    | Ci | $\sum Ci$ | Total    |
|-----------------------------------------|----|-----------|----------|
| if n<256                                | C5 | 1         | C5       |
| PRC4=PRC4(1:n);                         |    |           |          |
| CB=mod((STL-PRC4),256);                 |    |           |          |
| else                                    |    |           |          |
| blok=ceil(n/256);                       | C3 | 2         | 2C3      |
| CB=[];                                  | C1 | 1         | C1       |
| for i=1:blok                            | C4 | n/256     | n/256C4  |
| if n>256                                | C5 | n/256     | n/256C5  |
| dumi=STL(1:256);                        | C3 | n/256     | n/256C3  |
| hasil=mod((dumi-PRC4),256);             | C2 | 4n/256    | 4n/256C2 |
| KRC4=PRC4;                              |    |           |          |
| for I=1:256                             | C4 | n         | nC4      |
| s(I)=I-1;                               | C2 | n         | C2       |
| end;                                    |    |           |          |
| J=0;                                    | C1 | n/256     | nC1/256  |
| for I=1:256                             | C4 | n         | nC4      |
| J=mod((J+s(I)+ KRC4(I)),256);           | C2 | 5n        | 5nC2     |
| dummy=s(I);                             | C1 | n         | C1       |
| s(I)=s(J+1);                            | C2 | n         | nC2      |
| s(J+1)=dummy;                           | C2 | n         | nC2      |
| end;                                    |    |           |          |
| I=0;                                    | C1 | n/256     | nC1/256  |
| J=0;                                    | C1 | n/256     | nC1/256  |
| for idx=1:256                           | C4 | n         | nC4      |
| I =mod((I + 1),256) ;                   | C2 | 4n        | 4nC2     |
| J =mod((J + KRC4(I + 1)),256);          | C2 | 5n        | 5nC2     |
| dummy=KRC4(I+1);                        | C2 | n         | nC2      |
| KRC4(I+1)=KRC4(J+1);                    | C2 | 2n        | 2nC2     |
| KRC4(J+1)=dummy;                        | C2 | n         | nC2      |
| t=mod((KRC4(I + 1) + KRC4(J + 1)),256); | C2 | 6n        | 6nC2     |
| PRC4(idx)=KRC4(t + 1) ;                 | C2 | n         | nC2      |
| end;                                    |    |           |          |
| STL=STL(257:end);                       | C3 | n/256     | nC3/256  |
| else                                    |    |           |          |
| PRC4=PRC4(1:n);                         |    |           |          |
| hasil=mod((STL-PRC4),256);              |    |           |          |
| end;                                    |    |           |          |
| CB=[CB hasil];                          | C2 | 1         | C2       |
| n=length(STL);                          | C3 | 1         | C3       |

| Code                              | Ci | $\sum Ci$ | Total  |
|-----------------------------------|----|-----------|--------|
| end;                              |    |           |        |
| end;                              |    |           |        |
| n=length(CB);                     | C3 | 1         | C3     |
| m=length(kunci);                  | C3 | 1         | C3     |
| if n>m                            | C5 | 1         | C5     |
| t=m+1;                            | C2 | 1         | C2     |
| KB=kunci;                         | C1 | 1         | C1     |
| while n>=t                        | C4 | n         | nC4    |
| KB(t)=mod((KB(t-m)+KB(t-1)),256); | C2 | 6n        | 6nC2   |
| t=t+1;                            | C2 | n         | nC2    |
| end;                              |    |           |        |
| else                              |    |           |        |
| KB=kunci(1:n);                    |    |           |        |
| end;                              |    |           |        |
| data=[];                          | C1 | 1         | C1     |
| for j=1:n                         | C4 | n         | nC4    |
| hasil=CB(j)+KB(j);                | C2 | n         | nC2    |
| data=[data mod(hasil,256)];       | C2 | 3         | 3C2    |
| end;                              |    |           |        |
| n=length(data);                   | C3 | 1         | C3     |
| i=1;                              | C1 | 1         | C1     |
| Plain=[];                         | C1 | 1         | C1     |
| while n>i                         | C4 | n         | nC4    |
| X=data(i);                        | C1 | n         | nC1    |
| baris=[];                         | C1 | n         | nC1    |
| while X~='59'                     | C4 | 256n      | 256nC4 |
| baris=[baris X];                  | C1 | 256n      | 256n   |
| i=i+1;                            | C2 | 256n      | 256nC2 |
| X=data(i);                        | C1 | 256n      | 256nC1 |
| end;                              |    |           |        |
| hasil=strcat(baris);              | C3 | n         | nC3    |
| Plain=[Plain; cellstr(hasil)];    | C3 | 2n        | 2nC3   |
| i=i+1;                            | C2 | n         | nC2    |
| end;                              |    |           |        |
| time=toc;                         | C1 | 1         | C1     |
| Td=time                           | C1 | 1         | C1     |
|                                   |    |           |        |
