# Supplementary material for: Improvement of nuclear facilities DNP3 protocol data transmission security using super encryption BRC4 in SCADA systems
Source: PeerJ Comput Sci. 2021 Nov 4;7:e727. doi: 10.7717/peerj-cs.727 (PMC8594588; doi:10.7717/peerj-cs.727)
Supplement: Supplemental Information 1 [file peerj-cs-07-727-s001.xlsx]

## Sheet: Table 1
0	LD	M8002
1	SET	S0
3	STL	S0
4	ZRST	S20	S80
9	RST	M0
10	OUT	T0	K1
13	LD	T0
14	ANI	X001
15	ANI	X012
16	MPS
17	ANI	X015
18	SET	S20
20	MPP
21	AND	X015
22	SET	S25
24	SET	S30
26	STL	S20
27	LD	X013
28	ANI	X002
29	OUT	Y006
30	LD	X014
31	ANI	X003
32	OUT	Y007
33	LD	X015
34	OR	X001
35	SET	S0
37	LD	X012
38	SET	S90
40	RST	S20
42	STL	S90
43	LD	M8013
44	OUT	Y002
45	OUT	T1	K100
48	LD	T1
49	OR	X001
50	ORI	X012
51	SET	S0
53	STL	S25
54	LD	X001
55	SET	S0
57	LD	X012
58	SET	S90
60	ZRST	S31	S42
65	LDI	X015
66	SET	M0
67	STL	S30
68	LD	M0
69	SET	S0
71	LD	X000
72	SET	S31
74	STL	S31
75	LDI	X002
76	OUT	Y006
77	LD	X002
78	SET	S32
80	STL	S32
81	LDI	X003
82	OUT	Y007
83	LD	X003
84	SET	S33
86	STL	S33
87	LDI	X003
88	OUT	Y007
89	LD	X003
90	OUT	T2	K3
93	LD	T2
94	SET	S34
96	STL	S34
97	OUT	Y001
98	OUT	T3	K5
101	LDI	X003
102	OUT	Y007
103	LD	T3
104	SET	S35
106	STL	S35
107	OUT	Y001
108	OUT	Y011
109	LDI	X003
110	OUT	Y007
111	LD	X007
112	SET	S36
114	STL	S36
115	OUT	Y001
116	OUT	Y011
117	MPS
118	ANI	X002
119	OUT	Y006
120	MPP
121	OUT	Y004
122	LD	X011
123	SET	S37
125	STL	S37
126	OUT	Y001
127	MPS
128	ANI	X002
129	OUT	Y006
130	MPP
131	OUT	T4	K5
134	LD	T4
135	SET	S38
137	STL	S38
138	OUT	Y001
139	MPS
140	ANI	X002
141	OUT	Y006
142	MPP
143	OUT	Y010
144	LD	X004
145	SET	S39
147	STL	S39
148	OUT	Y001
149	MPS
150	ANI	X002
151	OUT	Y006
152	MPP
153	OUT	Y010
154	OUT	Y003
155	LD	X006
156	SET	S40
158	STL	S40
159	OUT	T6	K20
162	LD	T6
163	SET	S41
165	STL	S41
166	OUT	Y005
172	LD	X002
173	SET	S42
175	STL	S42
176	OUT	T7	K2
179	MPS
180	ANI	M0
181	SET	S30
183	MPP
184	AND	M0
185	SET	S0
187	RET
188	END
