# Supplementary material for: Improvement of nuclear facilities DNP3 protocol data transmission security using super encryption BRC4 in SCADA systems
Source: PeerJ Comput Sci. 2021 Nov 4;7:e727. doi: 10.7717/peerj-cs.727 (PMC8594588; doi:10.7717/peerj-cs.727)
Supplement: Supplemental Information 2 [file peerj-cs-07-727-s002.xlsx]

## Sheet: Table 1
0	LD	M8000
1	OUT	M8028
3	LDI	X000
4	ANI	X001
5	ANI	X031
6	OUT	T2	K1
9	LD	T2
10	OUT	M0
11	LD	X002
12	OR	X003
13	ANI	M2
14	ANI	M3
15	ANI	M4
16	AND	M0
17	OUT	M1
18	LD	X004
19	OR	X005
20	ANI	M1
21	ANI	M3
22	ANI	M4
23	AND	M0
24	OUT	M2
25	LD	X006
26	OR	X007
27	ANI	M1
28	ANI	M2
29	ANI	M4
30	AND	M0
31	OUT	M3
32	LD	X010
33	OR	X011
34	ANI	M1
35	ANI	M2
36	ANI	M3
37	AND	M0
38	OUT	M4
39	LD	M1
40	AND	X002
41	AND	M0
42	OUT	M8
43	LD	M1
44	AND	X003
45	AND	M0
46	OUT	M9
47	LD	M2
48	AND	X004
49	AND	M0
50	OUT	M10
51	LD	M2
52	AND	X005
53	AND	M0
54	OUT	M11
55	LD	M3
56	AND	X006
57	AND	M0
58	OUT	M12
59	LD	M3
60	AND	X007
61	AND	M0
62	OUT	M13
63	LD	M4
64	AND	X010
65	AND	M0
66	OUT	M14
67	LD	M4
68	AND	X011
69	AND	M0
70	OUT	M15
71	LD	X031
72	OUT	M16
73	LD	X032
74	AND	M17
75	LD	X012
76	ANI	X033
77	ORB
78	ANI	X013
79	OR	M22
80	ANI	X027
81	AND	M16
82	OUT	M17
83	LD	X032
84	AND	M18
85	LD	X013
86	ANI	X033
87	ORB
88	ANI	X012
89	OR	M23
90	ANI	X030
91	AND	M16
92	OUT	M19
93	LD	M19
94	AND	X026
95	AND	M16
96	OUT	M18
97	LD	X027
98	OR	X030
99	AND	M16
100	OUT	M103
101	LD	X031
102	AND	X033
103	OUT	M21
104	LDI	M22
105	ANI	M23
106	ANI	M24
107	AND	M8012
108	AND	M21
109	OUT	C16	K6
112	LD	M24
113	OR	M22
114	OR	M23
115	OR	M8002
116	AND	M21
117	RST	C16
119	LD	C16
120	ANI	M24
121	AND	M21
122	OUT	M25
123	LD	M33
124	OR	M27
125	OR	T8
126	ANI	M29
127	ANI	M28
128	AND	M21
129	OUT	T8	K2
132	LD	T8
133	AND	M21
134	OUT	T9	K50
137	LD	T8
138	ANI	T9
139	ANI	M26
140	AND	M21
141	OUT	M24
142	LD	T9
143	OR	M26
144	AND	M21
145	OUT	T10	K2
148	LD	T9
149	AND	M21
150	OUT	T11	K70
153	LD	T10
154	ANI	T11
155	ANI	M26
156	AND	M21
157	OUT	M22
158	LD	M27
159	ANI	T9
160	OR	T11
161	AND	M21
162	OUT	M27
163	LD	M27
164	AND	M21
165	PLS	M28
167	LD	M24
168	AND	X041
169	OR	M26
170	AND	M21
171	OUT	M26
172	LD	T10
173	AND	M26
174	ANI	M29
175	AND	M21
176	OUT	M23
177	LD	M23
178	AND	X042
179	AND	M21
180	OUT	T12	K30
183	LD	M23
184	ANI	X042
185	AND	M21
186	OUT	T13	K30
189	LD	T12
190	OR	T13
191	OR	M29
192	AND	M21
193	OUT	M29
194	LD	Y025
195	AND	X001
196	OUT	M40
197	LD	M77
198	ANI	Y001
199	LD	M78
200	AND	M71
201	ORB
202	OR	X004
203	AND	M40
204	OUT	M77
205	LD	X026
206	OR	X011
207	AND	M71
208	AND	Y014
209	AND	X014
210	AND	M33
211	ANI	X012
212	AND	M40
213	OUT	Y015
214	LD	X012
215	AND	X013
216	AND	M33
217	LD	M78
218	ANI	M82
219	ORB
220	AND	M40
221	OUT	M78
222	LD	X014
223	AND	M33
224	AND	X012
225	AND	M71
226	ANI	X013
227	LD	M80
228	ANI	X014
229	AND	M74
230	ORB
231	AND	M40
232	OUT	T0	K20
235	LD	X012
236	AND	X013
237	AND	M40
238	OUT	T1	K20
241	LD	X000
242	OR	X001
243	ANI	X031
244	OUT	T3	K1
247	LD	T3
248	OUT	Y025
249	LD	M79
250	OUT	M32
251	LD	X040
252	OR	M79
253	AND	Y025
254	OUT	M79
255	LD	Y014
256	OR	M74
257	AND	M79
258	OUT	M74
259	LD	Y016
260	OR	Y017
261	AND	M80
262	OR	T15
263	LD	X014
264	OR	Y006
265	ANB
266	ANI	T17
267	AND	M79
268	OUT	T15	K30
271	LD	M73
272	OR	M77
273	AND	M70
274	ORI	M74
275	ANI	M75
276	ANI	X017
277	ANI	M102
278	ANI	T1
279	AND	M79
280	OUT	M80
281	LD	T20
282	AND	M37
283	AND	X003
284	LD	T16
285	ANI	M33
286	ORB
287	OR	T15
288	AND	M79
289	OUT	T16	K1
292	OUT	M75
293	LD	T16
294	ANI	M80
295	AND	M79
296	OUT	M86
297	LD	X017
298	ANI	T15
299	ANI	M76
300	ANI	X002
301	LDI	X041
302	LD	X036
303	AND	X041
304	AND	X027
305	ORB
306	ANB
307	AND	M79
308	OUT	T17	K2
311	LD	T17
312	ANI	X002
313	AND	M79
314	OUT	M81
315	LD	X020
316	AND	M79
317	PLS	M76
319	LDI	M33
320	ORI	M71
321	OR	X014
322	LD	X017
323	AND	X020
324	OR	X002
325	ANB
326	ANI	M77
327	ANI	T15
328	AND	M79
329	OUT	Y014
330	LD	M81
331	AND	Y014
332	ANI	X002
333	AND	M79
334	OUT	M82
335	LD	X002
336	AND	M79
337	OUT	T18	K2
340	LD	T18
341	AND	M79
342	OUT	M83
343	LD	T18
344	AND	M35
345	AND	M79
346	OUT	T19	K2
349	LD	T19
350	AND	M79
351	OUT	M84
352	LD	T19
353	AND	M35
354	AND	M36
355	AND	M79
356	OUT	T20	K1
359	LD	T20
360	AND	M79
361	OUT	M85
362	LD	M71
363	ANI	Y014
364	AND	M79
365	OUT	M70
366	LD	X014
367	ANI	Y014
368	AND	M79
369	PLS	M72
371	LD	M73
372	ANI	M86
373	OR	M72
374	AND	M79
375	OUT	M73
376	LD	X003
377	AND	M83
378	ANI	M35
379	AND	M79
380	OUT	M101
381	LD	X003
382	AND	M84
383	ANI	M36
384	AND	M79
385	OUT	M100
386	LD	X003
387	AND	M85
388	ANI	M37
389	AND	M79
390	OUT	M99
391	LD	X021
392	OR	X022
393	AND	M82
394	AND	M79
395	OUT	T4	K20
398	LD	M70
399	AND	X033
400	AND	M33
401	OR	M102
402	AND	M79
403	OUT	M102
404	LD	M68
405	OR	M71
406	ANI	X017
407	AND	M79
408	OUT	M71
409	LD	X025
410	OR	M69
411	ANI	X026
412	AND	M79
413	OUT	M69
414	LD	M71
415	ANI	Y014
416	AND	X014
417	LD	M33
418	ANI	X011
419	ORB
420	ANI	M87
421	ANI	X026
422	AND	M79
423	OUT	M88
424	LD	X017
425	AND	M79
426	OR	M8002
427	RST	C17
429	RST	C18
431	RST	C19
433	RST	C20
435	LD	M32
436	AND	M33
437	OUT	M39
438	LD	M64
439	AND	X010
440	AND	M39
441	OUT	C17	K8
444	LD	M64
445	AND	M65
446	AND	M39
447	OUT	C18	K4
450	LD	M64
451	AND	M66
452	AND	M39
453	OUT	C19	K2
456	LD	M64
457	AND	M67
458	AND	M39
459	OUT	C20	K1
462	LD	X010
463	AND	C17
464	ORI	X010
465	OR	X011
466	AND	M39
467	OUT	M65
468	LD	X007
469	AND	C18
470	ORI	X007
471	OR	X011
472	AND	M65
473	AND	M39
474	OUT	M66
475	LD	X006
476	AND	C19
477	ORI	X006
478	OR	X011
479	AND	M66
480	AND	M39
481	OUT	M67
482	LD	X005
483	OR	X011
484	AND	C20
485	LDI	X011
486	ANI	X005
487	ORB
488	AND	M67
489	LDI	X005
490	ANI	X006
491	ANI	X007
492	ANI	X010
493	ORB
494	AND	M39
495	OUT	M68
496	LD	M69
497	AND	M39
498	PLS	M64
500	LD	M33
501	AND	M39
502	OUT	T21	K2
505	LD	T21
506	AND	Y014
507	ANI	M71
508	ANI	M88
509	ANI	M34
510	AND	M39
511	OUT	M87
512	LD	Y000
513	AND	X015
514	SET	M384
515	LD	M384
516	ANI	Y017
517	ANI	X017
518	ANI	X031
519	AND	Y000
520	OUT	Y016
521	LD	Y006
522	AND	X015
523	OR	X024
524	RST	M384
525	LD	Y000
526	AND	X016
527	ANI	X017
528	ANI	X031
529	OUT	Y017
530	LD	M35
531	ANI	Y002
532	OR	X021
533	OUT	M35
534	LD	M36
535	ANI	Y002
536	OR	X022
537	OUT	M36
538	LD	M37
539	AND	M32
540	OR	X023
541	ANI	Y001
542	OUT	M37
543	LD	M33
544	ANI	Y000
545	OR	X024
546	ANI	X017
547	OUT	M33
548	LD	M34
549	ANI	X026
550	OR	X025
551	OUT	M34
552	LD	M8
553	OR	M80
554	AND	X014
555	ANI	X017
556	OUT	M90
557	LD	M90
558	OR	X037
559	LDI	X041
560	OR	X042
561	ANB
562	LD	M32
563	ANI	X003
564	LD	M0
565	AND	X037
566	ORB
567	AND	X017
568	ANI	M94
569	ANI	X042
570	AND	X041
571	ORB
572	ANI	M91
573	ANI	X027
574	ANI	X031
575	AND	X036
576	OUT	M92
577	LD	X036
578	AND	X027
579	OUT	T32	K10
582	LD	T32
583	ORI	X036
584	OR	X041
585	AND	M90
586	OR	M24
587	AND	T14
588	AND	X014
589	ANI	T23
590	ANI	X017
591	OUT	Y000
592	LD	X026
593	OUT	T14	K1
596	LD	M14
597	ANI	X020
598	OR	M81
599	ANI	T23
600	OUT	Y001
601	LDI	X041
602	OR	X042
603	LD	T32
604	AND	X036
605	AND	X041
606	AND	X027
607	ORB
608	LD	M10
609	OR	M82
610	ANB
611	ANI	T23
612	OUT	Y002
613	LD	M11
614	OR	M83
615	AND	M6
616	ANI	M35
617	LDI	X043
618	ORI	M0
619	ANB
620	ANI	T23
621	ANI	X021
622	OUT	Y003
623	LD	X034
624	OUT	T33	K200
627	LD	X035
628	OR	M6
629	AND	T33
630	OUT	M6
631	LD	M11
632	OR	M84
633	LD	M35
634	ANI	M36
635	LD	X043
636	AND	M0
637	ORB
638	ANB
639	AND	M6
640	ANI	T23
641	ANI	X022
642	OUT	Y004
643	LD	M15
644	OR	M85
645	ANI	M37
646	ANI	T23
647	OUT	Y005
648	LD	M9
649	OR	M86
650	LDI	M97
651	LD	X042
652	AND	X036
653	AND	X030
654	AND	T34
655	ORB
656	ANI	X041
657	LD	X041
658	AND	X036
659	AND	X030
660	AND	T34
661	ORB
662	ANB
663	OR	M25
664	ANI	M33
665	OUT	M94
666	LD	X036
667	AND	X042
668	ANI	X017
669	ANI	M33
670	OUT	M97
671	LD	T23
672	AND	X017
673	OR	M94
674	ANI	X024
675	OUT	Y006
676	LD	M12
677	OR	M87
678	AND	M33
679	ANI	X017
680	OUT	M89
681	LD	M89
682	LD	M33
683	AND	M0
684	ANI	X037
685	ORB
686	ANI	X041
687	ANI	X042
688	LD	X017
689	AND	X041
690	AND	M86
691	ORB
692	LD	M0
693	AND	X017
694	AND	X041
695	ORB
696	LDI	X017
697	AND	X042
698	AND	M86
699	ORB
700	LD	M0
701	ANI	X017
702	AND	X042
703	ORB
704	AND	X036
705	ANI	X037
706	ANI	M92
707	ANI	X030
708	ANI	X031
709	OUT	M91
710	LD	X030
711	AND	X036
712	OUT	T34	K10
715	LD	T34
716	ORI	X036
717	OR	X041
718	OR	X042
719	AND	M89
720	ANI	M34
721	ANI	T23
722	ANI	X025
723	OUT	Y007
724	LD	M8
725	OR	M90
726	AND	X014
727	OR	M13
728	OR	M88
729	OR	M19
730	OR	M24
731	ANI	X026
732	OUT	Y010
733	LD	M17
734	ANI	X027
735	OR	M92
736	OUT	Y011
737	LD	M18
738	ANI	X030
739	OR	M91
740	OUT	Y012
741	LD	Y000
742	OUT	T5	K4
745	LD	T5
746	ANI	Y016
747	ANI	Y017
748	ANI	X031
749	OUT	Y013
750	LD	Y000
751	OR	Y001
752	OR	Y002
753	OR	Y003
754	OR	Y004
755	OR	Y005
756	OR	Y006
757	OR	Y007
758	OR	Y010
759	OR	Y011
760	OR	Y012
761	OUT	T35	K2
764	LD	T35
765	OUT	Y020
766	LD	Y016
767	OR	Y017
768	AND	Y000
769	OR	Y001
770	OR	Y002
771	OR	Y003
772	OR	Y004
773	OR	Y005
774	OR	Y006
775	OR	Y007
776	OR	Y010
777	OR	Y011
778	OR	Y012
779	OUT	Y021
780	LD	M8012
781	OUT	C21	K3
784	LD	C22
785	OR	M8002
786	RST	C21
788	LD	M8012
789	AND	C21
790	OUT	C22	K3
793	LDI	C21
794	OR	M8002
795	RST	C22
797	LDI	X014
798	AND	M8
799	OUT	M98
800	LD	M74
801	ANI	X014
802	AND	X001
803	LD	X033
804	AND	M32
805	ORB
806	OR	M103
807	OR	T0
808	OR	T1
809	OR	T15
810	ANI	C21
811	LD	X031
812	AND	X033
813	OR	M98
814	ANI	X014
815	ORB
816	OR	T4
817	OUT	Y022
818	LD	M74
819	ANI	X014
820	AND	X001
821	LD	M32
822	AND	X033
823	ORB
824	OR	M101
825	OR	T0
826	OR	M99
827	OR	T15
828	ANI	C21
829	LD	M8
830	ANI	X014
831	ORB
832	OR	T4
833	OUT	Y023
834	LD	X031
835	AND	X033
836	ANI	X014
837	LD	T15
838	OR	M101
839	OR	M103
840	OR	M100
841	ANI	C21
842	ORB
843	LD	M11
844	OR	M83
845	ANI	M6
846	ORB
847	OUT	Y024
848	LD	Y022
849	OR	Y023
850	OR	Y024
851	OR	T15
852	OR	M103
853	OR	T0
854	OR	T1
855	OR	M101
856	OR	M99
857	OR	M100
858	OR	T23
859	OUT	T6	K600
862	OUT	T23	K550
865	LD	M71
866	AND	X026
867	AND	X033
868	OR	T6
869	OR	T7
870	OUT	Y026
871	LD	Y020
872	ANI	Y011
873	ANI	Y012
874	OUT	T7	K1800
877	LD	Y025
878	AND	X032
879	AND	M33
880	OUT	Y027
881	END
