# Supplementary material for: Improvement of nuclear facilities DNP3 protocol data transmission security using super encryption BRC4 in SCADA systems
Source: PeerJ Comput Sci. 2021 Nov 4;7:e727. doi: 10.7717/peerj-cs.727 (PMC8594588; doi:10.7717/peerj-cs.727)
Supplement: Supplemental Information 3 [file peerj-cs-07-727-s003.xlsx]

## Sheet: Table 1
0	LD	SM402
1	AND	X8
2	AND	X0B
3	AND	X0F
4	FMOV	K0	R0	K2048
8	LDI	SM409
9	OUT	Y25
10	LDI	M1
11	CALL	P0
13	LD	M1
14	CALL	P1
16	LD	M1
17	ANI	X5
18	CALL	P2
20	PLF	M17
22	LD	M1
23	AND	X5
24	CALL	P3
26	PLF	M19
28	LD	M906
29	AND	M907
30	AND	M977
31	AND=	K1	D27
34	CALL	P11
36	LD	M906
37	AND	M907
38	CALL	P13
40	AND	M987
41	AND=	K0	R260
44	SET	L1052
45	LD	X40
46	LD<>	R116	D41
49	OR	M17
50	OR	M19
51	ANB
52	MOV	R116	D41
54	FMOV	K100	R126	K2
58	OUT	M16
59	LD<	K0	R116
62	AND>=	D227	R116
65	OUT	M11
66	LD	M16
67	MOV	R116	Z0
70	*	D224	R276Z0	D200
73	+	D200	R260Z0	R114
77	+	D200	R260Z0	D100Z0
81	MPS
82	AND=	K0	R260
85	RST	R115
87	MRD
88	AND>	K500	R114
91	MOV	K500	R114
93	MRD
94	AND<	K1000	R114
97	MOV	K1000	R114
99	MPP
100	*	R114	K1	D202
103	*	R225	K1000	D204
106	D/	D204	D202	D206
110	LD	SM400
111	MPS
112	AND<=	K1000	D101
115	OUT	M201
116	MRD
117	AND<=	K1000	D102
120	OUT	M202
121	MRD
122	AND<=	K1000	D103
125	OUT	M203
126	MRD
127	AND<=	K1000	D104
130	OUT	M204
131	MRD
132	AND<=	K1000	D105
135	OUT	M205
136	MRD
137	AND<=	K1000	D106
140	OUT	M206
141	MRD
142	AND<=	K1000	D107
145	OUT	M207
146	MRD

## Sheet: Table 2
150	OUT	M208
151	MRD
152	AND<=	K1000	D109
155	OUT	M209
156	MPP
157	AND<=	K1000	D110
160	OUT	M210
161	LD	SM400
162	MPS
163	AND=	K1	D227
166	AND	M201
167	OUT	M211
168	MRD
169	AND=	K2	D227
172	AND	M201
173	AND	M202
174	OUT	M212
175	MRD
176	AND=	K3	D227
179	AND	M201
180	AND	M202
181	AND	M203
182	OUT	M213
183	MRD
184	AND=	K4	D227
187	AND	M201
188	AND	M202
189	AND	M203
190	AND	M204
191	OUT	M214
192	MRD
193	AND=	K5	D227
196	AND	M201
197	AND	M202
198	AND	M203
199	AND	M204
200	AND	M205
201	OUT	M215
202	MRD
203	AND=	K6	D227
206	AND	M201
207	AND	M202
208	AND	M203
209	AND	M204
210	AND	M205
211	AND	M206
212	OUT	M216
213	MRD
214	AND=	K7	D227
217	AND	M201
218	AND	M202
219	AND	M203
220	AND	M204
221	AND	M205
222	AND	M206
223	AND	M207
224	OUT	M217
225	MRD
226	AND=	K8	D227
229	AND	M201
230	AND	M202
231	AND	M203
232	AND	M204
233	AND	M205
234	AND	M206
235	AND	M207
236	AND	M208
237	OUT	M218
238	MRD
239	AND=	K9	D227
242	AND	M201
243	AND	M202
244	AND	M203
245	AND	M204
246	AND	M205
247	AND	M206
248	AND	M207
249	AND	M208
250	AND	M209
251	OUT	M219
252	MPP
253	AND=	K10	D227
256	AND	M201
257	AND	M202
258	AND	M203
259	AND	M204
260	AND	M205
261	AND	M206
262	AND	M207
263	AND	M208
264	AND	M209
265	AND	M210
266	OUT	M220
267	LDI	M211
268	ANI	M212
269	ANI	M213
270	ANI	M214
271	ANI	M215
272	ANI	M216
273	ANI	M217
274	ANI	M218
275	ANI	M219
276	ANI	M220
277	OUT	Y2F
278	LD	SM400
279	MOV	R260	D224
281	AND<>	R107	D240
284	MOV	R107	D240
286	RST	R260
288	RST	D224
290	RST	R115
292	SET	L1052
293	LD	M16
294	CALL	P14
296	LD	M121
297	AND	M1
298	AND<	K0	R116
301	AND>	K11	R116
304	INC	D55
306	LDI	M16
307	AND	M1
308	AND<	K0	D188
311	AND<	D188	D55
314	-	D188	D55
317	OUT	M20

## Sheet: Table 3
342	LD	SM400
343	MOV	D194	D120
345	*	D120	K2	D122
348	LD	M20
349	AND	X40
350	MPS
351	AND<=	D178	D170
354	MPS
355	ANI	M241
356	INC	D194
358	MRD
359	AND	M241
360	+	D196	D194
363	+	D197	D198
366	AND>	D198	D184
369	INC	D194
371	-	D184	D198
374	MPP
375	AND<	D170	D194
378	MOV	D170	D194
380	MRD
381	AND>	D178	D170
384	MPS
385	ANI	M241
386	DEC	D194
388	MRD
389	AND	M241
390	-	D196	D194
393	+	D197	D198
396	AND>	D198	D184
399	DEC	D194
401	-	D184	D198
404	MPP
405	AND>	D170	D194
408	MOV	D170	D194
410	MRD
411	AND>	K800	D194

## Sheet: Table 4
416	MRD
417	AND<	K2000	D194
420	MOV	K2000	D194
422	MRD
423	ANI	SM400
424	TO	H4	K0	D194	K1
429	MPP
430	*	D194	D164	D241
433	D/	D241	K2000	D243
438	MOV	D243	R212
440	LDI	M0
441	RST	R212
443	LD	X9A
444	ANI	Y0B2
445	LD	X95
446	AND	Y0B2
447	ORB
448	ANI	X90
449	ANI	X99
450	OR	Y0A3
451	LD	X98
452	ORI	T1
453	ANB
454	ANI	M345
455	LDI	M301
456	ORI	X94
457	ANB
458	AND	X8F
459	AND	X9B
460	AND	X0C3
461	ANI	X9E
462	AND	X85
463	OUT	Y0A3
464	PLS	M100
466	OUT	T1	K70
470	LD	Y0A3
471	ANI	Y0B0
472	OUT	T0	K3000
476	LD	Y0A3
477	AND	T0
478	OR	Y0B0
479	ANI	T12
480	OUT	Y0B0
481	LD	Y0B0
482	OUT	T12	K3000
486	LD	Y0B2
487	AND	X9B
488	AND	X0C3
489	OR	Y0A3
490	OUT	Y0B1
491	LDI	X3
492	ANI	Y0A3
493	OUT	T29	K20
497	LD	X3
498	ANI	Y0A3
499	OUT	T24	K20
503	LDI	Y0A3
504	LD	T29
505	OR	T24
506	ANB
507	OUT	T3	K20
511	LD	M300
512	OUT	M335
513	LD	T9
514	OR	M345
515	ANB
516	OUT	M344
517	LD	M344
518	AND	X91
519	OUT	M345
520	LD	X93
521	OR	M300
522	AND	Y0A3
523	ANI	X9A
524	ANI	L1029
525	OUT	M300
526	LD	X87
527	AND	T1
528	ANI	M300
529	ANI	L1029
530	OUT	Y0C3

## Sheet: Table 5
532	ORI	Y0A0
533	AND	Y0A3
534	AND	Y0AB
535	OUT	Y0A7
536	LDI	X0C3
537	ANI	X9B
538	OR	M100
539	OUT	M551
540	LDI	X0C3
541	ORI	X9B
542	OR	M345
543	OUT	Y0A6
544	LD	M551
545	OR	Y0B2
546	OUT	Y0A8
547	LDI	X94
548	ANI	X96
549	OR	M301
550	AND	Y0A2
551	ANI	X9A
552	OUT	M301
553	LD	M554
554	OUT	M555
555	LD	M553
556	OUT	M554
557	LD	M552
558	OUT	M553
559	LD	Y0B8
560	OUT	M552
561	LD	X96
562	AND	M301
563	ANI	T3
564	ANI	Y0A3
565	OUT	Y0B8
566	LDI	X97
567	ANI	Y0EB
568	AND	M555
569	OUT	Y0EA
570	LD	Y0B8
571	AND	X97
572	OUT	Y0EB
573	LD	M301
574	AND	X83
575	OR	Y0C2
576	AND	Y0B8
577	OUT	Y0C2
578	LD	X97
579	OR	L1116
580	ANI	Y0B2
581	ANI	Y0A3
582	OUT	L1116
583	LDI	X99
584	OUT	T25	K5
588	LD	M680
589	AND	X0D6
590	ANI	T2
591	AND	L1115
592	AND	M303
593	LD	X9A
594	AND	Y0AB
595	ORB
596	LD	Y0B9
597	AND	M319
598	ORB
599	AND	X99
600	LDI	X8E
601	OR	X86
602	OR	Y0B9
603	AND	T3
604	ANI	L1115
605	AND	Y0A2
606	AND	T25
607	ANI	Y0E9
608	ORB
609	AND	L1116
610	AND	X8F
611	ANI	Y0A3
612	OUT	Y0B9
613	LD	L1115
614	ANI	X99
615	AND	L1116

## Sheet: Table 6
617	ANI	L1120
618	ANI	M551
619	OUT	L1119
620	LD	X99
621	ANI	Y0B9
622	OR	L1115
623	AND	L1116
624	ANI	L1120
625	ANI	M551
626	OUT	L1115
627	LD	M680
628	AND	X0D6
629	LD	X9A
630	AND	Y0AB
631	ORB
632	AND	Y0B9
633	OR	M319
634	ANI	Y0B2
635	ANI	Y0A3
636	OUT	M319
637	LD	M319
638	OR	Y0B2
639	AND	L1119
640	ANI	L1120
641	ANI	X9E
642	ANI	X99
643	LDI	X98
644	ORI	M355
645	ANB
646	ANI	X9A
647	AND	X0D4
648	AND	X0CD
649	OUT	Y0B2
650	LDI	X98
651	AND	Y0B2
652	OR	M355
653	AND	L1119
654	OUT	M355
655	LD	M355
656	OR	L1120
657	AND	X98
658	ANI	M551
659	AND	L1119
660	OUT	L1120
661	LD	X98
662	ANI	X9A
663	OUT	Y35
664	LD	X86
665	AND	T13
666	OR	L1150
667	AND	Y0A2
668	OUT	L1150
669	LD	X0CF
670	ANI	X0C0
671	OR	X0D4
672	AND	X8E
673	ANI	M517
674	AND	X9B
675	AND	X0C3
676	ANI	Y0B2
677	ANI	M430
678	OUT	M308
679	LD	L1150
680	ANI	L1125
681	ORI	X86
682	ANI	L1149
683	LDI	X86
684	ORI	M575
685	AND	Y0E8
686	ORB
687	AND	M308
688	OUT	Y0E8
689	LD	X84
690	AND	X80
691	AND	M575
692	LDI	M576
693	AND	Y31
694	ORB
695	AND	Y0E8
696	AND	T20
697	OUT	Y31

## Sheet: Table 7
699	AND	X80
700	AND	M576
701	AND	T10
702	AND	Y0E8
703	LDI	M575
704	AND	Y30
705	ORB
706	ANI	Y31
707	OUT	Y30
708	LDI	Y30
709	OUT	T20	K15
713	LD	M575
714	OR	M576
715	OUT	T10	K15
719	LD	M575
720	OUT	M577
721	LD	X81
722	AND	X82
723	ANI	M576
724	OUT	M575
725	LDI	X81
726	ANI	X82
727	ANI	M577
728	OUT	T18	K10
732	LD	T18
733	OUT	M576
734	LDI	Y32
735	AND	Y30
736	OUT	T21	K100
740	LD	T21
741	OUT	Y33
742	LD	X86
743	ANI	Y0E8
744	AND	X8F
745	AND	Y0A2
746	OR	T13
747	ANI	L1149
748	AND	X0CD
749	AND	X0D4
750	OR	M328
751	OUT	M328
752	LD	M328
753	AND	L1125
754	ANI	M428
755	OR	L1149
756	LD	Y0A0
757	ORI	X0CD
758	ORI	X0D4
759	ANB
760	ANI	M551
761	OUT	L1149
762	LD	Y31
763	AND	T13
764	AND	X86
765	AND	M428
766	AND	M364
767	OR	L1127
768	ANI	Y0A8
769	OUT	L1127
770	LD	Y30
771	OR	L1125
772	ANB
773	OUT	L1125
774	LDI	Y0E8
775	AND	X86
776	AND	T10
777	AND	M575
778	AND	X92
779	AND	L1125
780	OR	L1126
781	ANI	Y0A8
782	ANI	M551
783	OUT	L1126
784	LDI	X0DA
785	AND	L1140
786	LDI	X0DB
787	AND	L1146
788	ORB
789	LD	M657
790	AND	T9
791	OR	L1118
792	ANB
793	LD	L1118
794	AND	X0C3
795	ORB
796	ANI	Y0B2
797	OUT	L1118
798	LD	L1118
799	ANI	X0DA
800	LDI	X0DC
801	ANI	X0DD
802	ORI	X0DA
803	LD	M359
804	AND	L1118
805	OR	M658
806	ANB
807	ORB
808	OUT	Y0EC
809	LD	L1118
810	ANI	X0DB
811	LDI	X0DE
812	ANI	X0DF
813	ORI	X0DB
814	LD	M359
815	AND	L1118
816	OR	M658
817	ANB
818	ORB
819	OUT	Y0ED
820	LD	M641
821	ANI	M642
822	ANI	X90
823	AND	T3
824	OUT	T2	K30
828	LD	M510
829	OR	M514
830	AND	X0C0
831	AND	X0C3
832	ANI	X86
833	OUT	T11	K50
837	LD	Y30
838	AND	M364
839	AND	M428
840	OUT	M510
841	LD	X84
842	ANI	X80
843	OUT	M514
844	LD	M658
845	AND	L1118
846	LD	T11
847	AND	X0C0
848	ORB
849	LD	M517
850	ANI	M428
851	ORB
852	OR	M323
853	AND	X0C3
854	ANI	Y0B2
855	OUT	M517
856	LD	Y0A2
857	AND	X97
858	ANI	X86
859	OUT	Y0E9
860	LD	Y0A2
861	AND	X97
862	AND	X86
863	OUT	Y32
864	LD	M2
865	AND	T11
866	OUT	Y13
867	LD	X2
868	AND	Y0A3
869	OUT	T26	K3000
873	LD	T26
874	ANI	T28
875	OUT	T27	K30
879	LD	T27
880	OUT	T28	K100
884	LDI	Y0AC
885	ANI	X0DA
886	LDI	Y0AE
887	ANI	X0DB
888	ORB
889	OR	M323
890	LD	M517
891	LDI	Y0A3
892	OR	X84
893	ANB
894	ORB
895	OR	L1118
896	OR	T2
897	OR	Y33
898	OR	T27
899	OR	M709
900	OR	M711
901	OUT	Y0BF
902	LDI	X0CC
903	ORI	X0D0
904	AND	X0C0
905	OUT	M323
906	LD	X0D4
907	AND	X0CD
908	ANI	M310
909	OR	M374
910	LD	M311
911	ANI	T40
912	ANI	X0CA
913	ORB
914	ANI	M303
915	OUT	M311
916	OUT	T40	K2
920	LD	X0D4
921	AND	X0CD
922	ANI	M310
923	OR	M436
924	LD	M313
925	ANI	T41
926	ANI	X0CA
927	ORB
928	ANI	M303
929	OUT	M313
930	OUT	T41	K2
934	LD	M311
935	AND	M313
936	OR	M310
937	AND	X0D4
938	AND	X0CD
939	OUT	M310
940	LDI	X8F
941	ANI	X9E
942	OUT	M357
943	LDI	X0DC
944	ANI	X0DD
945	LDI	X0DE
946	ANI	X0DF
947	ORB
948	OUT	M426
949	LDI	M323
950	AND	M428
951	OUT	M427
952	LD	M427
953	MC	N0	M700
955	LD	M426
956	ORI	X0DA
957	ORI	X0DB
958	ANI	M357
959	ANI	X9E
960	OUT	M359
961	LDI	X92
962	AND	L1100
963	ANI	M359
964	ANI	M357
965	ANI	X9E
966	OUT	M361
967	LD	M363
968	AND	Y0E9
969	ANI	X80
970	AND	X84
971	OUT	M362
972	LDI	X86
973	AND	M352
974	OUT	M363
975	LDI	M361
976	ANI	M359
977	ANI	M357

## Sheet: Table 8
979	OUT	M352
980	LDI	Y0AB
981	ANI	M363
982	AND	M352
983	OUT	M353
984	LDI	X0C0
985	ORI	X8E
986	ANI	M363
987	ANI	M353
988	AND	M352
989	OUT	M354
990	LD	X9E
991	OR	M357
992	OR	M359
993	ANI	X0C1
994	OUT	L1105
995	MCR	N0
996	LDI	M323
997	ANI	M357
998	ANI	M359
999	ANI	M361
1000	ANI	M363
1001	ANI	M353
1002	ANI	M354
1003	ANI	X9E
1004	OUT	M356
1005	LD	L1150
1006	ANI	L1100
1007	LDI	M681
1008	ANI	M682
1009	ORI	X0CD
1010	AND	M303
1011	ORB
1012	LD	Y0A0
1013	OR	Y0A2
1014	ORI	M428
1015	AND	X0C1
1016	ORB
1017	AND	X0C0
1018	AND	X0C3
1019	AND	X9B
1020	ANI	L1105
1021	ANI	M517
1022	ANI	X9E
1023	OUT	M303
1024	LD	L1150
1025	OUT	L1100
1026	LDI	X0C0
1027	AND	X0CB
1028	OR	M309
1029	OUT	M316
1030	ANI	M318
1031	OUT	M317
1032	LD	M316
1033	OUT	M318
1034	LD	M317
1035	ANI	L1101
1036	LDI	M317
1037	AND	L1101
1038	ORB
1039	ANI	M311
1040	OR	M329
1041	LDI	M428
1042	OR	X0C0
1043	ANB
1044	OUT	L1101
1045	LDI	M303
1046	AND	T9
1047	ANI	M428
1048	ORI	L1101
1049	ORI	M356
1050	AND	X0CC
1051	ANI	M353
1052	ANI	X9E
1053	LDI	M362
1054	ANI	Y30
1055	ORI	T11
1056	ANB
1057	OUT	Y0E4
1058	LD	M317
1059	ANI	L1101

## Sheet: Table 9
1061	LD	M315
1062	ANI	L1102
1063	LDI	M315
1064	AND	L1102
1065	ORB
1066	ANI	M311
1067	ANI	M329
1068	OUT	L1102
1069	LDI	M303
1070	ANI	M428
1071	AND	T9
1072	ORI	L1102
1073	ORI	M356
1074	AND	X0D0
1075	ANI	M359
1076	ANI	M362
1077	ANI	M363
1078	OUT	Y0E5
1079	LD	M315
1080	ANI	L1102
1081	OUT	M315
1082	LD	M315
1083	ANI	L1103
1084	LDI	M315
1085	AND	L1103
1086	ORB
1087	ANI	M311
1088	ANI	M329
1089	OUT	L1103
1090	LDI	M303
1091	AND	T9
1092	ANI	M428
1093	ORI	L1103
1094	ORI	M356
1095	ANI	M354
1096	ANI	M359
1097	ANI	M361
1098	OUT	Y0E6
1099	LD	M315
1100	ANI	L1103
1101	OUT	M315
1102	LD	M315
1103	ANI	L1104
1104	LDI	M315
1105	AND	L1104
1106	ORB
1107	ANI	M311
1108	ANI	M329
1109	OUT	L1104
1110	LDI	M303
1111	AND	T9
1112	ANI	M428
1113	ORI	L1104
1114	ORI	M356
1115	ANI	M354
1116	ANI	X9E
1117	ANI	M357
1118	OUT	Y0E7
1119	LDI	L1101
1120	ANI	L1102
1121	ANI	L1103
1122	ANI	L1104
1123	ANI	M323
1124	OUT	M364
1125	LD	X0C0
1126	MC	N0	M701
1128	LD	L1101
1129	ANI	L1102
1130	ANI	L1103
1131	ANI	L1104
1132	OUT	M365
1133	LDI	L1101
1134	AND	L1102
1135	ANI	L1103
1136	ANI	L1104
1137	OUT	M366
1138	LD	L1101
1139	AND	L1102
1140	ANI	L1103
1141	ANI	L1104
1142	OUT	M367

## Sheet: Table 10
1144	ANI	L1102
1145	AND	L1103
1146	ANI	L1104
1147	OUT	M368
1148	LD	L1101
1149	ANI	L1102
1150	AND	L1103
1151	ANI	L1104
1152	OUT	M369
1153	LDI	L1101
1154	AND	L1102
1155	AND	L1103
1156	ANI	L1104
1157	OUT	M370
1158	LD	L1101
1159	AND	L1102
1160	AND	L1103
1161	ANI	L1104
1162	OUT	M371
1163	LDI	L1101
1164	ANI	L1102
1165	ANI	L1103
1166	AND	L1104
1167	OUT	M372
1168	LD	L1101
1169	ANI	L1102
1170	ANI	L1103
1171	AND	L1104
1172	OUT	M373
1173	MCR	N0
1174	LDI	L1101
1175	AND	L1102
1176	ANI	L1103
1177	AND	L1104
1178	OUT	M374
1179	LD	M329
1180	OUT	M320
1181	ANI	M322
1182	OUT	M321
1183	LD	M320
1184	OUT	M322
1185	LD	M321
1186	ANI	L1109
1187	LDI	M321
1188	AND	L1109
1189	ORB
1190	ANI	M313
1191	OUT	L1109
1192	LDI	L1109
1193	ORI	M356
1194	LDI	M323
1195	OR	T9
1196	ANB
1197	OUT	Y0E0
1198	LD	M321
1199	ANI	L1109
1200	OUT	M324
1201	LD	M324
1202	ANI	L1110
1203	LDI	M324
1204	AND	L1110
1205	ORB
1206	ANI	M313
1207	OUT	L1110
1208	LDI	L1110
1209	OR	M323
1210	ORI	M356
1211	OUT	Y0E1
1212	LD	M324
1213	ANI	L1110
1214	OUT	M324
1215	LD	M324
1216	ANI	L1111
1217	LDI	M324
1218	AND	L1111
1219	ORB
1220	ANI	M313
1221	OUT	L1111
1222	LDI	L1111
1223	OR	M323
1224	ORI	M356

[truncated: 18 more sheets: Table 11, Table 12, Table 13, Table 14, Table 15, Table 16, Table 17, Table 18, Table 19, Table 20, Table 21, Table 22, Table 23, Table 24, Table 25, Table 26, Table 27, Table 28]
